# Supplementary material
Source: HighWire-hosted journal article supplement (https://bmjopenquality.bmj.com/highwire/filestream/135962/field_highwire_adjunct_files/0/ds1496.docx)

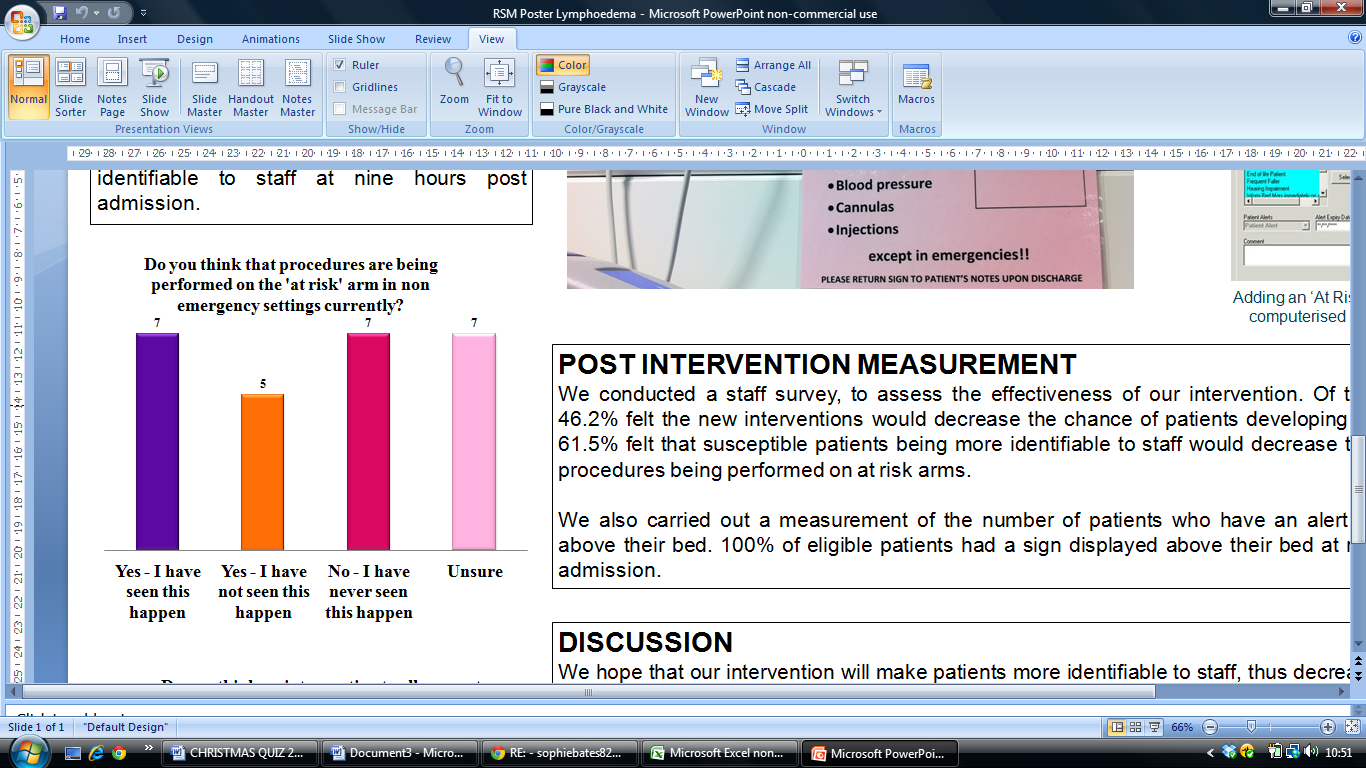


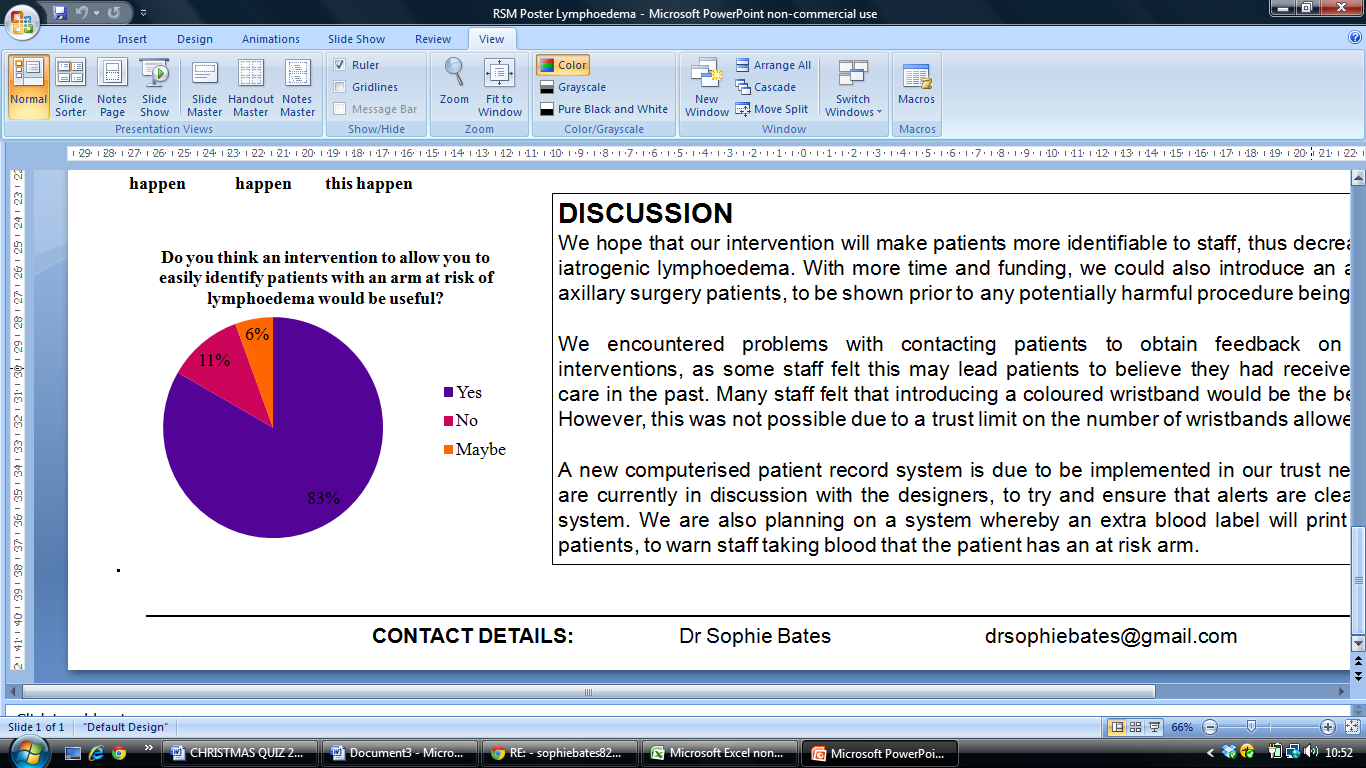

Supplement: ds1496.docx [file ds1496.docx]
